# Supplementary material for: The Subcellular Localization of the Receptor for Platelet-Activating Factor in Neutrophils Affects Signaling and Activation Characteristics
Source: Hindawi journal article supplement (doi:10.1155/2013/456407), 2013-01-01

Supplementary Fig.1 Andréasson *et al*

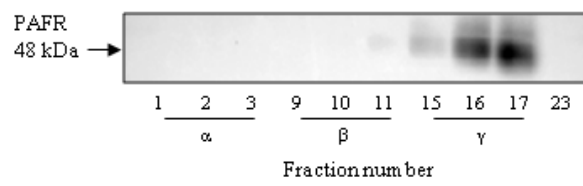

Supplementary Fig.2 Andr asson *et al*

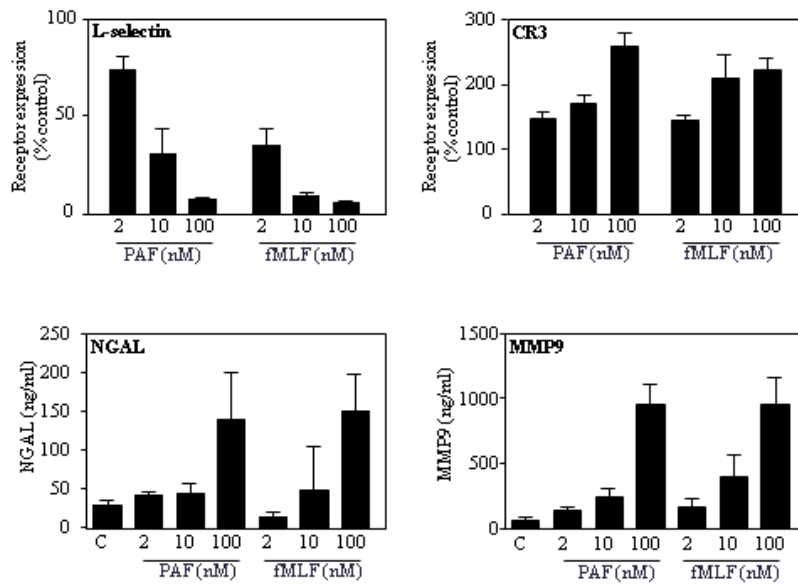

Supplementary Fig.3 Andréasson *et al*

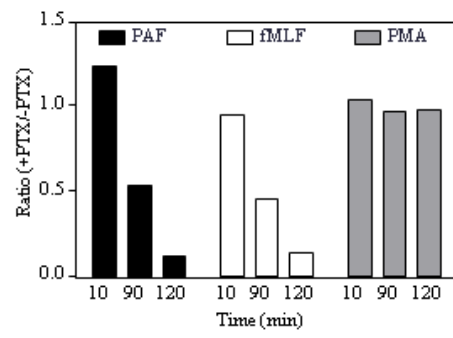

Supplementary Fig.4 Andréasson *et al*

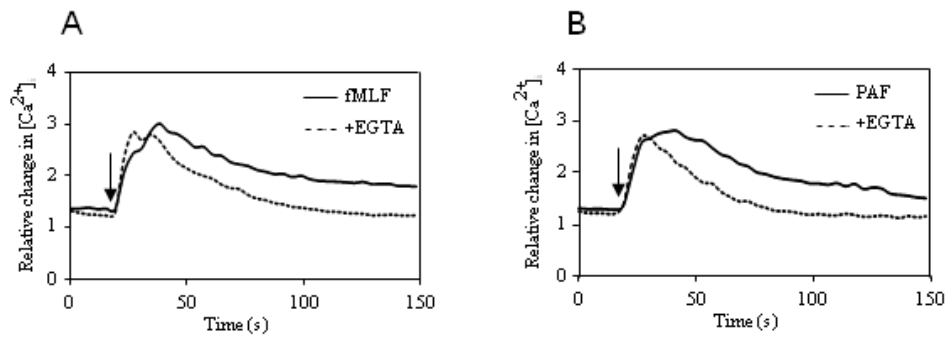

Supplement: f1 [file 456407.f1.pdf]
